# Supplementary material for: The mitotic spindle is chiral due to torques within microtubule bundles
Source: PubMed Central journal article supplement (PMC6120957; doi:10.1038/s41467-018-06005-7), 2018-09-03
Supplement: 41467_2018_6005_MOESM1_ESM.pdf [file 41467_2018_6005_MOESM1_ESM.pdf]

**Supplementary Information**

**The mitotic spindle is chiral due to torques within microtubule bundles**

**Novak et al.**

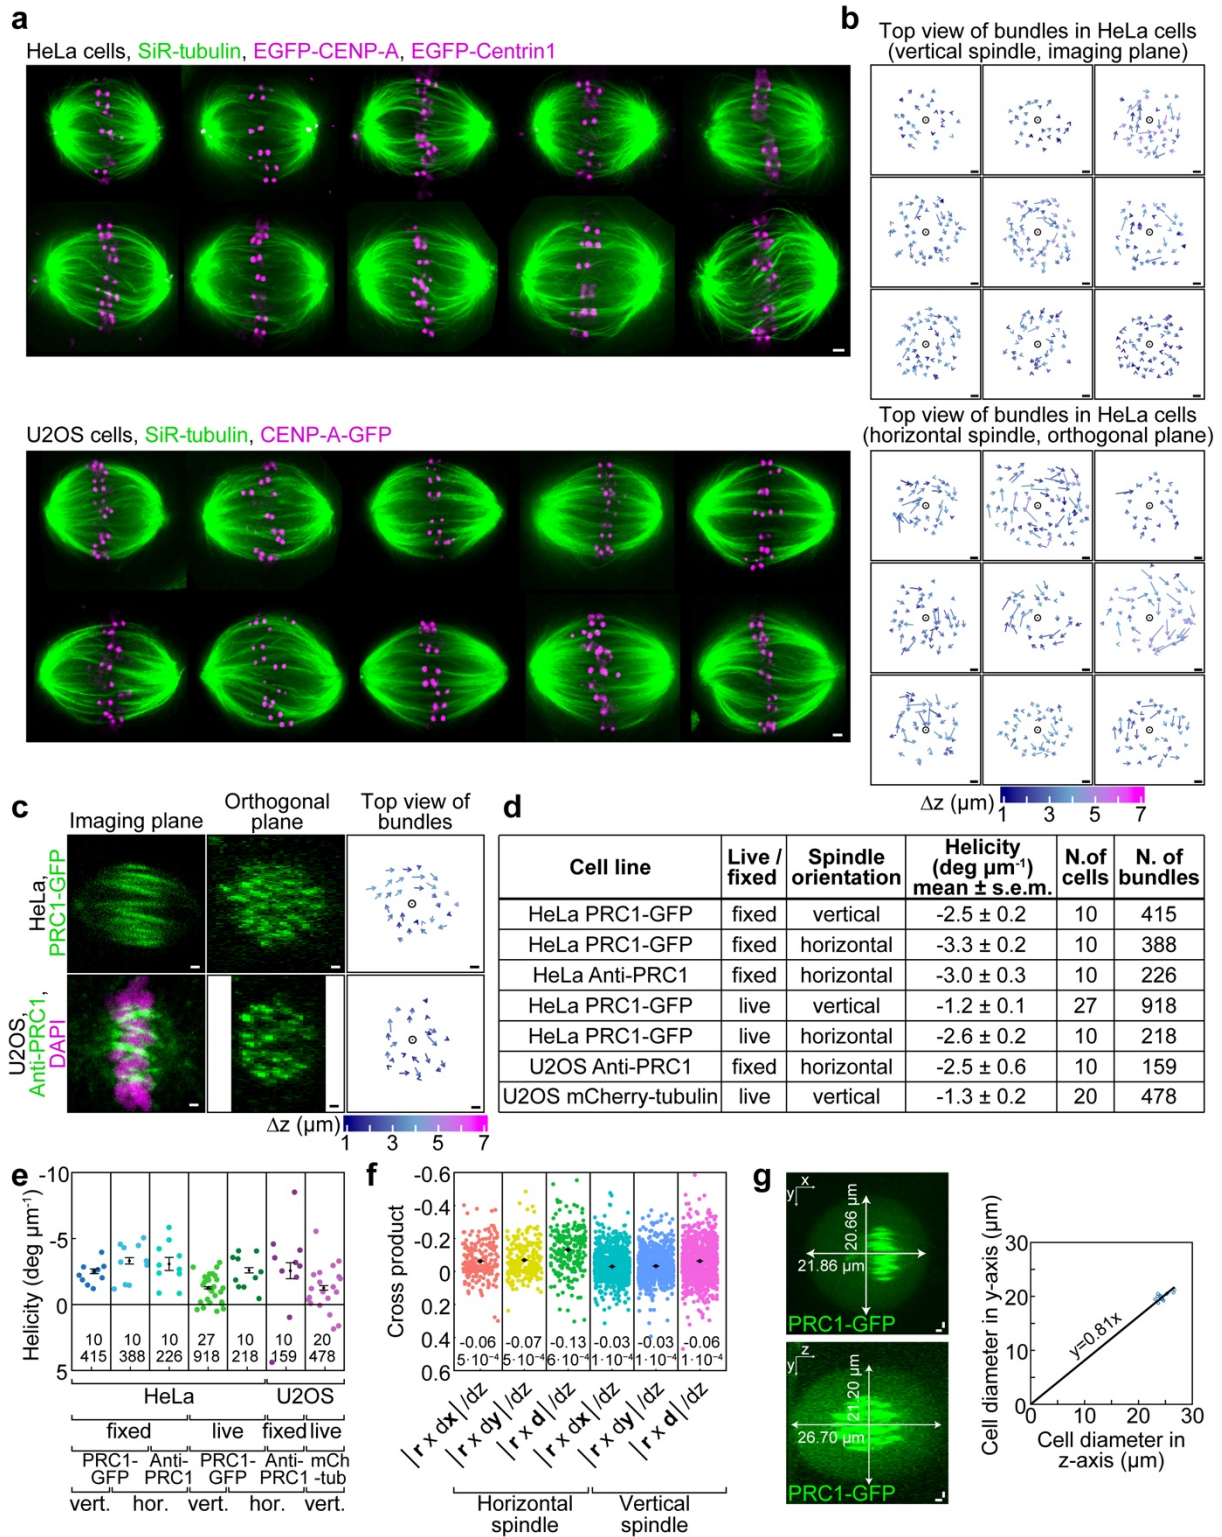

**Supplementary Figure 1. Extended characterization of spindle chirality**

**a**, STED images of metaphase spindles in live HeLa cells expressing EGFP-CENP-A and EGFP-centrin1 (magenta) (top), and live U2OS cells expressing CENP-A-GFP (magenta) (bottom). Microtubules are labeled with SiR-tubulin (green). **b**, Arrows connecting starting and ending points of bundles from fixed HeLa cells expressing PRC1-GFP and mRFP-CENP-B,

traced upwards, from vertical (top) and horizontal (bottom) spindles. Circle denotes spindle major axis. Z-distance between the first and last tracked point of a bundle is color coded, see color bar. **c**, Top, imaging plane of a horizontal spindle in a live HeLa cell expressing PRC1-GFP, with DNA labelled by SiR-DNA (only PRC1-GFP is shown) (left); orthogonal plane of the same spindle (middle); arrows connecting starting and ending points of PRC1-GFP bundles traced upwards (right). Longer arrows roughly correspond to larger twist around the spindle axis (circle), colors show z-distance between starting and ending points, see color bar. Bottom, horizontal spindle in an unlabeled U2OS cell immunostained for PRC1, with DNA stained by DAPI, legend as in the top row. Left, maximum intensity projections of 5 central planes; middle, single planes. **d**, Summary of spindle helicity values for conditions and cell lines as indicated. Cell lines used: HeLa cells expressing PRC1-GFP, unlabeled HeLa cells immunostained for PRC1, unlabeled U2OS cells immunostained for PRC1, U2OS cells expressing CENP-A-GFP, mCherry- $\alpha$ -tubulin and photoactivatable (PA)-GFP-tubulin. **e**, Spindle helicity averaged over cells for different conditions and cell lines as in **d**. Each dot represents a weighted mean over all bundles in a cell. Weight was determined by the number of points tracked in a bundle. The numbers in each column represent the number of cells (top) and bundles (bottom), error bars, s.e. with respect to the weighted mean. **f**, Cross product between the normalized position vector and the components of the total bundle displacement vector, as well as with the displacement vector itself. Bundles from all untreated live HeLa cells expressing PRC1-GFP are shown.  $r$ , normalized position vector;  $dx$ , displacement in x direction;  $dy$ , displacement in y direction;  $d$ , total displacement. Displacement in x-direction ( $dx$ ) and y-direction ( $dy$ ) are similar, suggesting there was no anisotropy in image transformation. Numbers in each group denote the mean (top) and s.e.m. (bottom). **g**, xy projection of a live HeLa cell expressing PRC1-GFP, with horizontally oriented spindle (top); the same cell in yz projection (bottom); linear regression showing the relationship between the cell diameter in y and z axes (right). Ratio of y and z diameter was  $0.814 \pm 0.008$  (mean  $\pm$  s.e.m.,  $n=13$ ). This ratio was different from 1 due to refractive index mismatch, and was used as a correction factor for z-coordinates (see Methods). Ratio of x and y diameter,  $0.99 \pm 0.01$ , was not different from 1. All scale bars, 1  $\mu\text{m}$ .

**a**

| Cell type       | Treatment         | Helicity (deg $\mu\text{m}^{-1}$ )<br>mean $\pm$ s.e.m. | Number of cells | Number of bundles | p-values                                |
|-----------------|-------------------|---------------------------------------------------------|-----------------|-------------------|-----------------------------------------|
| HeLa horizontal | None              | $-2.6 \pm 0.2$                                          | 10              | 218               | ] $7 \cdot 10^{-11}$                    |
| HeLa horizontal | STLC (5-25 min)   | $-0.9 \pm 0.2$                                          | 16              | 317               |                                         |
| HeLa vertical   | None (0 min)      | $-1.2 \pm 0.1$                                          | 27              | 918               | ] $2 \cdot 10^{-9}$ } $2 \cdot 10^{-6}$ |
| HeLa vertical   | STLC (5 min)      | $-0.2 \pm 0.2$                                          | 12              | 395               |                                         |
| HeLa vertical   | STLC (10 min)     | $-0.2 \pm 0.2$                                          | 8               | 203               |                                         |
| HeLa vertical   | None (0 min)      | $-1.2 \pm 0.1$                                          | 27              | 918               | ] 0.042 } 0.33                          |
| HeLa vertical   | DMSO (5 min)      | $-0.9 \pm 0.2$                                          | 10              | 337               |                                         |
| HeLa vertical   | DMSO (10 min)     | $-1.0 \pm 0.2$                                          | 7               | 228               |                                         |
| U2OS vertical   | None              | $-1.3 \pm 0.2$                                          | 20              | 478               | ] $3 \cdot 10^{-6}$                     |
| U2OS vertical   | STLC (10 min)     | $0.01 \pm 0.2$                                          | 8               | 141               |                                         |
| HeLa horizontal | None              | $-2.6 \pm 0.2$                                          | 10              | 218               | ] 0.41                                  |
| HeLa horizontal | Lat A (1-2 hours) | $-2.4 \pm 0.2$                                          | 10              | 240               |                                         |

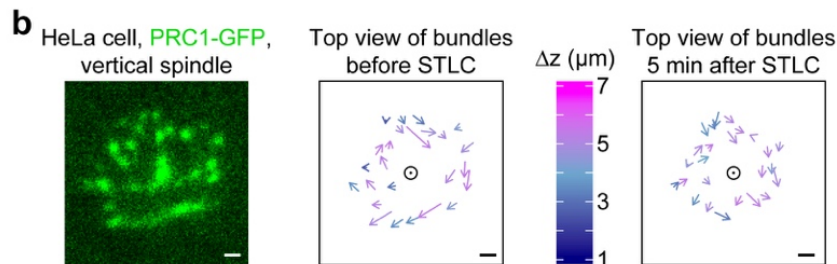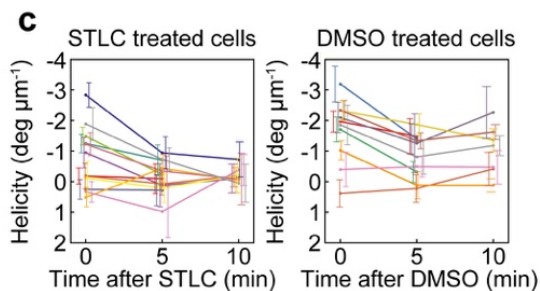

**d**

| Treatment | Spindle dimensions ( $\mu\text{m}$ ), mean $\pm$ s.e.m. | Number of cells | p-values |
|-----------|---------------------------------------------------------|-----------------|----------|
| STLC      | Length = $11.5 \pm 0.2$                                 | 16              | ] 0.79   |
| None      | Length = $11.6 \pm 0.4$                                 | 10              |          |
| STLC      | Width = $9.4 \pm 0.2$                                   | 16              | ] 0.34   |
| None      | Width = $9.1 \pm 0.2$                                   | 10              |          |

## Supplementary Figure 2. Extended analysis of spindles after treatments with STLC and latrunculin A

**a**, Summary of spindle helicity values from live cells treated with STLC, Latrunculin A or DMSO in different conditions as indicated. **b**, Equatorial plane of a vertical spindle in a live untreated HeLa cell expressing PRC1-GFP (left); arrows connecting starting and ending points of PRC1-GFP bundles traced upwards, from the same cell, before (middle) and 5 minutes after STLC treatment (right). Circle denotes spindle axis. Z-distance between the first and last traced point is color coded, see color bar. **c**, Helicity of vertical spindles from individual live HeLa cells expressing PRC1-GFP measured before and at 5 and 10 minutes after treatment with either STLC (left) or DMSO (right). Values from each cell are represented by different color and connected with lines. **d**, Spindle length and width from horizontal live HeLa cells expressing PRC1-GFP treated with STLC or untreated, as indicated. Error bars, s.e.m. p-values, unpaired t-test. Scale bars, 1  $\mu\text{m}$ .

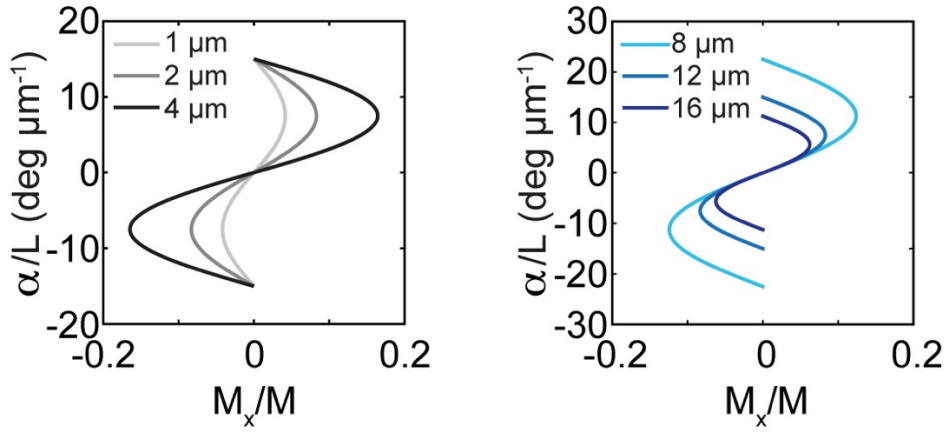

### Supplementary Figure 3. Additional results from the model

Twist of a microtubule bundle,  $\alpha$ , divided by spindle length,  $L$ , as a function of the twisting moment,  $M_x = M_{ix}$ , normalized to the bending moment,  $M = \sqrt{M_{iy}^2 + M_{iz}^2}$  (the same curve for  $i = 1, 2$ ). Results are shown for three sizes of the spindle pole,  $2d = 1, 2$  and  $4 \mu\text{m}$  (left), and three lengths of the mitotic spindle,  $L = 8, 12$  and  $16 \mu\text{m}$  (right). The other parameters are  $L = 12 \mu\text{m}$  (left) and  $d = 1 \mu\text{m}$  (right), whereas  $\kappa = 900 \text{ pN } \mu\text{m}^2$ .
